# Supplementary material
Source: PubMed Central journal article supplement (PMC7802235)
Supplement: 12871_2021_1233_MOESM1_ESM.pdf [file 12871_2021_1233_MOESM1_ESM.pdf]

## **Supplementary material**

### **Postoperative outcomes in surgical COVID-19 patients – a multicenter cohort study**

François M. Carrier, MD MSc<sup>1,2,3</sup>

Éva Amzallag, MSc<sup>2</sup>

Vincent Lecluyse, MD<sup>3,4</sup>

Geneviève Côté, MD MSc<sup>3,5</sup>

Etienne J. Couture, MD<sup>6,7</sup>

Frédéric D’Aragon, MD MSc<sup>8</sup>

Stanislas Kandelman, MD<sup>9</sup>

Alexis F. Turgeon, MD MSc<sup>6,10</sup>

Alain Deschamps, MD PhD<sup>3,11</sup>

Roy Nitulescu, MA<sup>12</sup>

Codjo Djignefa Djade, MSc<sup>12</sup>

Martin Girard, MD<sup>1,3,13,14</sup>

Pierre Beaulieu, MD PhD<sup>3,14</sup>

Philippe Richebé, MD PhD<sup>3,15</sup>

<sup>1</sup> Department of Anesthesiology & Department of Medicine - Critical Care Division, Centre hospitalier de l’Université de Montréal

<sup>2</sup> Carrefour de l’innovation et de l’évaluation en santé, Centre de recherche du CHUM

<sup>3</sup> Department of Anesthesiology and Pain Medicine, Faculty of Medicine, Université de Montréal

<sup>4</sup> Department of Anesthesiology, Hôpital du Sacré-Coeur de Montréal, CIUSSS du Nord de l’île de Montréal

<sup>5</sup> Department of Anesthesiology, Centre hospitalier Universitaire Sainte-Justine

<sup>6</sup> Department of Anesthesiology and Critical Care Medicine, Division of Critical Care Medicine, Université Laval

<sup>7</sup> Institut universitaire de cardiologie et de pneumologie de Québec

<sup>8</sup> Department of Anesthesiology, Université de Sherbrooke

<sup>9</sup> Department of Anesthesiology, McGill University Health Center

<sup>10</sup> Department of Anesthesiology & Department of Medicine – CHU de Québec - Université Laval Research Center, Population Health and Optimal Health Practices Research Unit (Trauma - Emergency - Critical Care Medicine)

<sup>11</sup> Department of Anesthesiology, Institut de cardiologie de Montréal, Université de Montréal

<sup>12</sup> Centre d’intégration et d’analyse des données médicales, Centre de recherche du CHUM

<sup>13</sup> Imagerie et ingénierie, Centre de recherche du CHUM

<sup>14</sup> Department of Anesthesiology, Centre hospitalier de l’Université de Montréal

<sup>15</sup> Department of Anesthesiology and Pain Medicine, Hôpital Maisonneuve-Rosemont, CIUSSS de l’Est de l’île de Montréal

**Table S1. Surgical specialties**

| Variables                        | Category                  | Symptomatic<br>(n=26) | Asymptomatic<br>(n=18) | Suspected<br>(n=18) | Recovered<br>(n=18) |
|----------------------------------|---------------------------|-----------------------|------------------------|---------------------|---------------------|
| Type of surgery                  | Major                     | 9 (35%)               | 7 (39%)                | 5 (28%)             | 4 (22%)             |
|                                  | Minor                     | 17 (65%)              | 11 (61%)               | 13 (72%)            | 14 (78%)            |
| Type of major surgical specialty | Abdominal                 | 3 (12%)               | 2 (11%)                | 4 (22%)             | 2 (11%)             |
|                                  | Neurosurgery              | 5 (19%)               | 5 (28%)                | 0 (0%)              | 1 (6%)              |
|                                  | Thoracic                  | 0 (0%)                | 0 (0%)                 | 1 (6%)              | 1 (6%)              |
|                                  | Vascular                  | 1 (4%)                | 0 (0%)                 | 0 (0%)              | 0 (0%)              |
| Type of minor surgical specialty | ENT                       | 6 (23%)               | 0 (0%)                 | 2 (11%)             | 3 (17%)             |
|                                  | Obstetrics                | 4 (15%)               | 4 (22%)                | 1 (6%)              | 0 (0%)              |
|                                  | Orthopedic (excl. spinal) | 2 (8%)                | 4 (22%)                | 4 (22%)             | 4 (22%)             |
|                                  | Other                     | 0 (0%)                | 0 (0%)                 | 0 (0%)              | 1 (6%)              |
|                                  | Peripheral vascular       | 2 (8%)                | 0 (0%)                 | 0 (0%)              | 0 (0%)              |
|                                  | Plastic surgery           | 0 (0%)                | 1 (6%)                 | 2 (11%)             | 2 (11%)             |
|                                  | Urogenital                | 3 (12%)               | 2 (11%)                | 4 (22%)             | 4 (22%)             |

**Table S2. Overall patients' characteristics**

| Variables                                                   | Suspected<br>(n = 18) | Recovered<br>(n = 18) |
|-------------------------------------------------------------|-----------------------|-----------------------|
| <b>Demographics</b>                                         |                       |                       |
| Age                                                         | 51.4 (28.5)           | 60.7 (17.6)           |
| Sex (female)                                                | 8 (44%)               | 10 (56%)              |
| <b>Comorbidities</b>                                        |                       |                       |
| Diabetes                                                    | 3 (17%)               | 5 (28%)               |
| Hypertension                                                | 7 (39%)               | 9 (50%)               |
| <b>COVID-19 symptoms and treatment at surgery</b>           |                       |                       |
| Days since positive test or clinical diagnosis <sup>1</sup> | 1 [0, 1]              | 23 [43, 46]           |
| Cough                                                       | 4 (22%)               | 1 (6%)                |
| Dyspnea                                                     | 3 (17%)               | 2 (11%)               |
| Respiratory distress                                        | 2 (11%)               | 1 (6%)                |
| Fever                                                       | 7 (39%)               | 2 (11%)               |
| Antibiotics                                                 | 8 (44%)               | 3 (17%)               |
| Steroids                                                    | 5 (28%)               | 0 (0%)                |
| <b>Preoperative respiratory and organ dysfunction</b>       |                       |                       |
| Oxygen                                                      | 7 (39%)               | 2 (11%)               |
| Invasive respiratory support                                | 3 (17%)               | 2 (11%)               |
| SOFA score <sup>2</sup>                                     | 3 [0, 7]              | 1 [0, 2]              |
| <b>Surgical characteristics</b>                             |                       |                       |
| General anesthesia                                          | 13 (72%)              | 11 (61%)              |
| Urgency <sup>3</sup>                                        | 15 (83%)              | 6 (33%)               |
| Major surgery                                               | 5 (28%)               | 4 (22%)               |
| Blood loss <sup>4</sup>                                     | 225 [150, 475]        | 300 [100, 1500]       |

Data is reported as mean (SD), as median [q1, q3] or as number of events (proportion in %).

<sup>1</sup> Positive test for patients who had recovered and clinical suspected diagnosis for suspected patients.

<sup>2</sup> When no bilirubin was measured preoperatively, we imputed a value of 0 for the liver component of the SOFA score. 2 missing values in "suspected" and 1 missing value in "who had recovered" subgroup.

<sup>3</sup> Urgency was defined by the need to undergo a surgery within 24 hours.

<sup>4</sup> 10 missing values in suspected patients and 8 in patients who had recovered.

N.B. BMI is not reported because of excessive missing values.

Abbreviations: BMI = body mass index, SOFA = Sequential Organ Function Assessment score

**Table S3. Patients' complications up to 30 days after surgery**

| Variables                                      | Suspected<br>(n = 18) | Recovered<br>(n = 18) |
|------------------------------------------------|-----------------------|-----------------------|
| <b>Complications</b>                           |                       |                       |
| Pulmonary complications                        | 6 (33%)               | 1 (6%)                |
| Infectious complications (non-pulmonary)       | 3 (17%)               | 2 (11%)               |
| AKI <sup>1</sup>                               | 5 (28%)               | 0 (0%)                |
| Thromboembolic complications                   | 3 (17%)               | 0 (0%)                |
| <b>Resource utilization</b>                    |                       |                       |
| New ICU admissions                             | 9 (50%)               | 5 (28%)               |
| Hospital length of stay                        | 10 [3, 22]            | 3 [0, 16]             |
| Mechanical ventilation free days (at 30 days)  | 27.0 (4.1)            | 29.3 (1.6)            |
| Organ dysfunction free days (at 30 days)       | 20.4 (11.5)           | 28.7 (3.9)            |
| <b>Mortality</b>                               |                       |                       |
| 30-day mortality                               | 3 (16.7%)             | 1 (5.6%)              |
| Kaplan-Meier survival probability <sup>2</sup> | 0.83 [0.68, 1.00]     | 0.94 [0.84, 1.00]     |

Data is reported as mean (SD), as median [q1, q3] or as number of events (proportion in %).

<sup>1</sup> 3 patients required renal replacement therapy in the suspected group.

<sup>2</sup> 30-day survival probability from the estimated Kaplan-Meier survival function, expressed with 95% confidence intervals.

Abbreviations: AKI = acute kidney injury, ICU = intensive care unit

**Figure S1. Kaplan-Meier curves of COVID-19, suspected and recovered patients.**

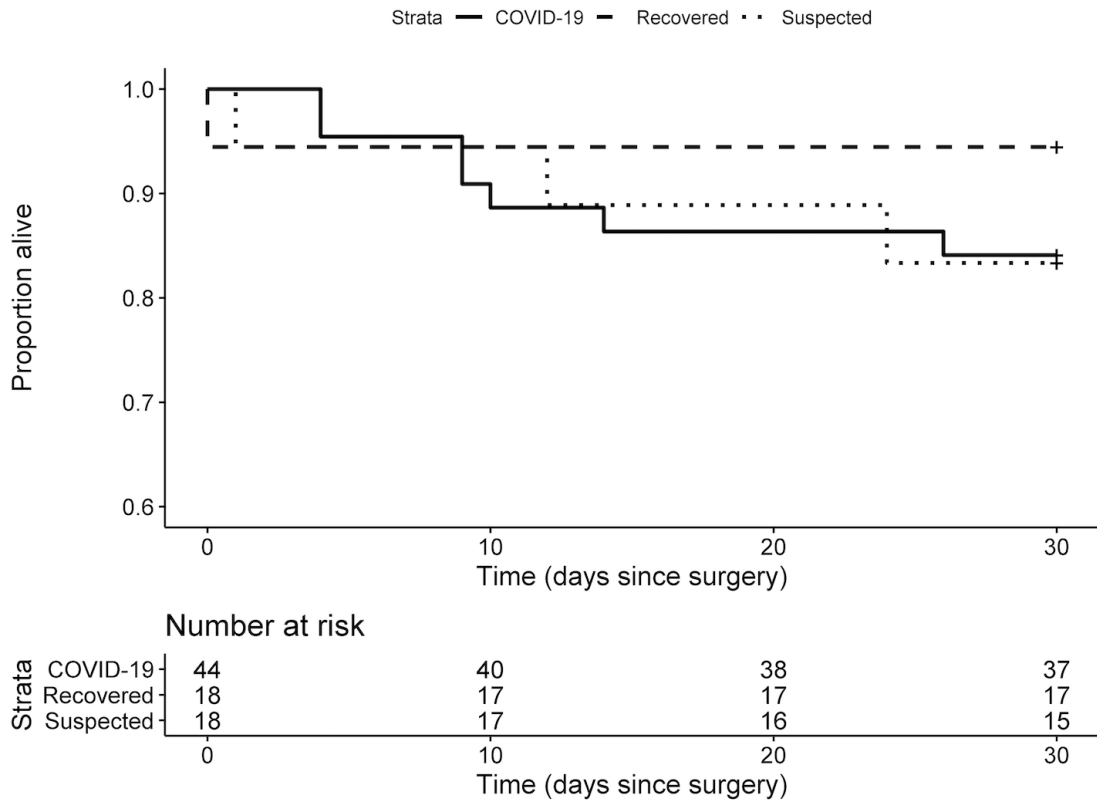

*P = 0.554 by log-rank test*

**List of participating centres:**

- Centre hospitalier de l'Université de Montréal
- Centre hospitalier Universitaire Sainte-Justine
- Hôpital du Sacré-Cœur-de-Montréal, CIUSSS du Nord de l'Île de Montréal
- Institut de Cardiologie de Montréal
- Hôpital Maisonneuve-Rosemont, CIUSSS de l'Est de l'île de Montréal
- McGill University Health Center
- Centre hospitalier Universitaire de Sherbrooke
- CHU de Québec – Université Laval
- Institut universitaire de cardiologie et de pneumologie de Québec - Université Laval
